# Supplementary material
Source: PubMed Central journal article supplement (PMC2584365)
Supplement: NIHMS2841-supplement-suppmat.pdf [file NIHMS2841-supplement-suppmat.pdf]

M T S Q A A P E 8

ACCTCCCGAGACCAGCCGTGCCCAACCCGAAGCTTGGCCTCCACTGGGGGCCACATGACCCAGTGAATGACCAGCCAGGCTGCCCCAG 90  
E A R P P R P G P K S F L L T E M R N A S G F L K T A G A P 38  
AGGAGGCTAGGCCTCAAGGCCCGGTCCAAAGAGCTTCTGCTCACAGAGATGAGGAATGCGTCAGGGTTTCTGAAGACAGCCGGAGCCC 180  
L V S A T W L P P S P P P A M P T V A A G P Q M E R V D N G 68  
CCCTCGTGTGAGCGACTGGCTTCCACCCAGCCCCCTCCGGCAATGCCACAGTGGCAGCCGGGCCACAGATGGAGCGCGTGGACAACG 270  
S Q G A P Q L F L T S A L A R G V S G V F V W T A L L L T G 98  
GCTCGCAGGGGGCCCCCAGCTTCTCCTCACCAGCGCATTGGCCCCGAGGCGTTTCAGGCGTGTGTGTATGGACTGCTCTGCTGCTAACC 360  
H Q I Y S H L R S Y T A P R E Q R F V I R L L F I V P I Y A 128  
GCCACAGATCTACTCCACCTACGTTCTTATACCGCCCCGAGAGCAGCGCTTCGTCATCCGCCTCCTGTTTCATTGTGCCATCTACG 450  
F D S W L S L L L L G G H P Y Y V Y F D S V R D C Y E A F V 158  
CCTTCGACTCCTGGCTCAGCCTCCTCCTTGGGGGCCATCCTTACTACGTCTACTTCGACTCTGTGCGAGACTGCTACGAAGCATTTG 540  
I Y S F L T L C F Q Y L G G E S A I M A E I R G K P I R S S 188  
TCATCTACAGTTTCTGACCTTGTGCTTCCAATATCTGGGGGGCAGAGCGCCATCATGGCTGAGATCCGAGGCAAACCTATCAGGTCCA 630  
C F Y G T C C L R G M S Y S I T F L R F C K Q A T L Q F C I 218  
GCTGCTTCTATGGGACCTGCTGCCTCCGTGGTATGTCTACTCCATCACGTTCTTACGTTCTGCAAAACAGGCCACACTCCAGTTCTGCA 720  
V K P V M A L I T I I L Q A F D K Y H D G D F N I H S G Y L 248  
TTGTGAAACCCGTTATGGCGCTGATCACCATCATCCTCCAGGCTTTTGACAAATACCACGATGGGGACTTCAACATCCACAGCGGCTACC 810  
Y V T L V Y N A S V S L A L Y A L F L F Y F A T R D L L R P 278  
TGTACGTGACCCTCGTGTACAATGCCTCGGTACGCTCTCTACGCTCTGTTTCTTCTACTTCGCTACCAGGGACCTCCTGAGAC 900  
F E P V L K F L T I K A I I F L S F W Q G M L L A I L E R C 308  
CCTTCGAGCCGGTACTCAAGTTCTCACCATCAAAGCCATCATCTTCTCCTTCTGGCAGGGAATGCTGTTGGCCATCTTGGAGAGGT 990  
G V I P E V Q A V D G T R V G A G T L A A G Y Q N F L I C V 338  
GTGGGGTCATCCCTGAGGTCCAGGCCGTGGACGGCACCAGGGTTGGGGCTGGTACCCTAGCCGCTGGCTACCAGAATTTCTCATCTGTG 1080  
E M L F A S L A L R Y A F P S Q V Y S E K K N S P V P P A P 368  
TTGAGATGCTGTTTCGCTCCCTCGCGCTGCGTTACGCTTCCCCAGCCAGGTGTACTCAGAGAAGAAGAACTCACCAGTCCCGCCAGCAC 1170  
M Q S I S S G L K E T I S P Q D I V Q D A I H N F S P A Y Q 398  
CTATGCAAAGCATATCCAGTGGCTTAAAGGAGACCATCAGCCCACAGGACATTGTCCAGGACGCCATTCATAACTTCTCGCCAGCCTACC 1260  
Q Y T Q Q S T H E A P G P G Q G G H P A P S T H P G P A S G 428  
AGCAGTACACACAGCAGTCCACACATGAAGCTCCTGGGCCTGGCCAGGGTGGGCACCCAGCACCCAGTACCCACCCCGGCCAGCCAGTG 1350  
S G G G K K S R N I E K R M L I P S E D L \* 449  
GCTCTGGAGGTGGTAAGAAGAGTCGCAACATAGAGAAACGCATGCTGATTCCCTCAGAGGACCTGTAGGGGCGCAGGGCGCGTGGAAAC 1440  
TAGCTGGGGATCA 1453

### Supplementary Figure S1. Sequence of Sdmg1

Predicted transmembrane domains are underlined and the potential C-terminal dileucine targeting motif is highlighted in blue.

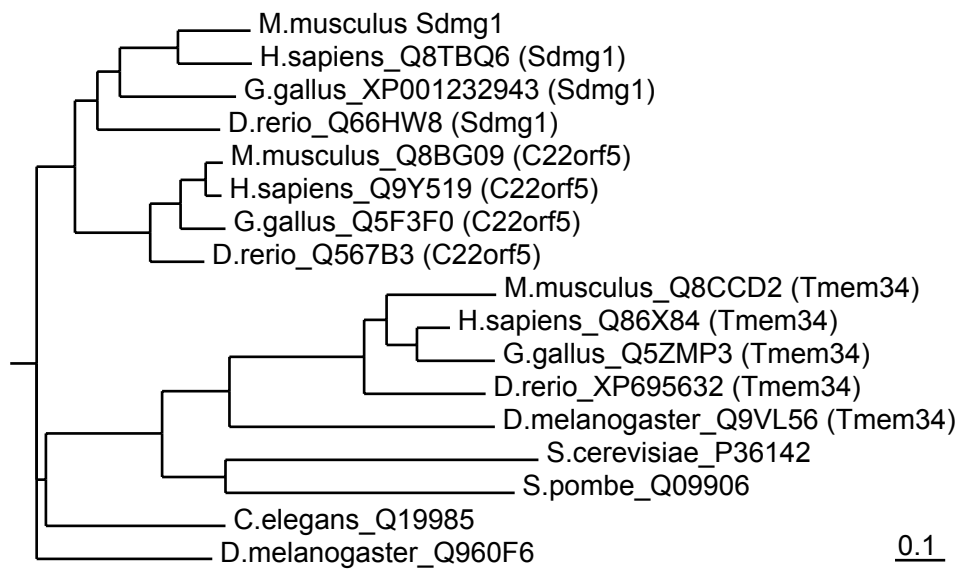

**Supplementary Figure S2. Phylogeny of DUF300 protein family members from selected model organisms**

Scale bar indicates 0.1 substitutions per site. Uniprot or Genbank accession numbers are indicated.

Multiple alignments and phylogenetic analysis were performed using CLUSTAL W (Thompson et al., 1994)

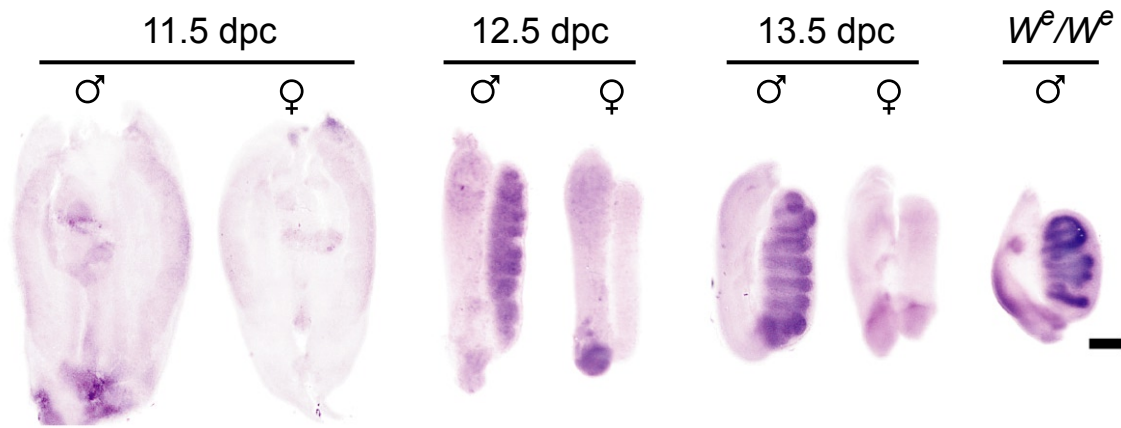

**Supplementary Figure S3. In situ hybridisation for *Sdmg1* in male and female embryonic gonads**  
*Sdmg1* exhibits male-specific expression in the testis cords at 12.5 dpc and 13.5 dpc, and expression in 14.5 dpc male *W<sup>e</sup>/W<sup>e</sup>* gonads. In situ hybridisation was performed as described by Henrique et al., 1995. Scale bar 0.2 mm.

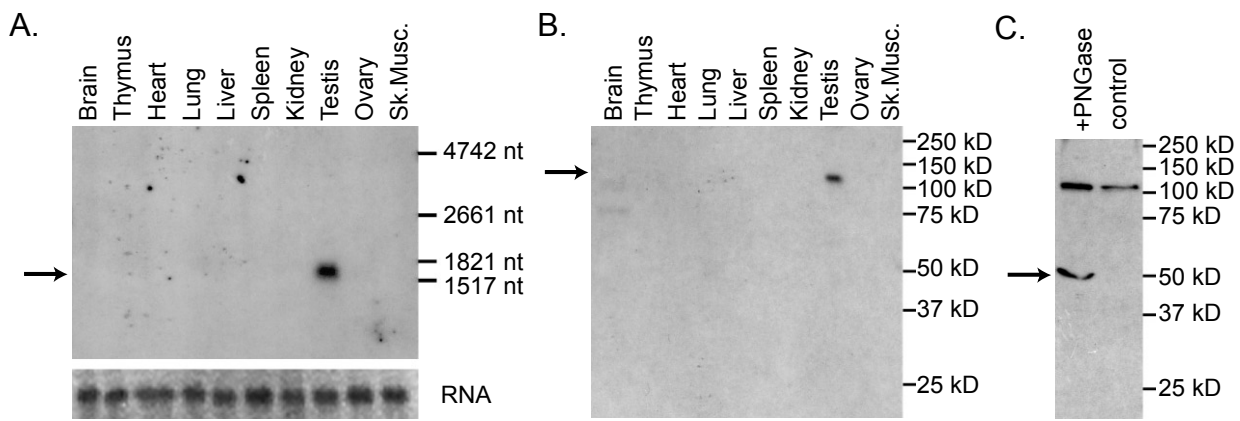

**Supplementary Figure S4. *Sdmg1* Has a Restricted Expression Profile in Adult Mouse Tissues**

A. Northern blot showing expression of *Sdmg1* RNA in testis (arrows). Methylene blue staining of ribosomal RNA is shown as a loading control. B. Western blot showing expression of *Sdmg1* protein in testis (arrow). The anti-*Sdmg1* band migrates at around 110 kD. C. Western blot showing an anti-*Sdmg1* band can be detected at around 50 kD after deglycosylation of testis extracts with PNGase. Northern and Western blotting was performed as described by Adams and McLaren, 2002. PNGase treatment of testis extracts was performed as recommended by the supplier (New England Biolabs).

Abbreviations: Sk.Musc., skeletal muscle; PNGase, Peptide: N-glycosylase F.

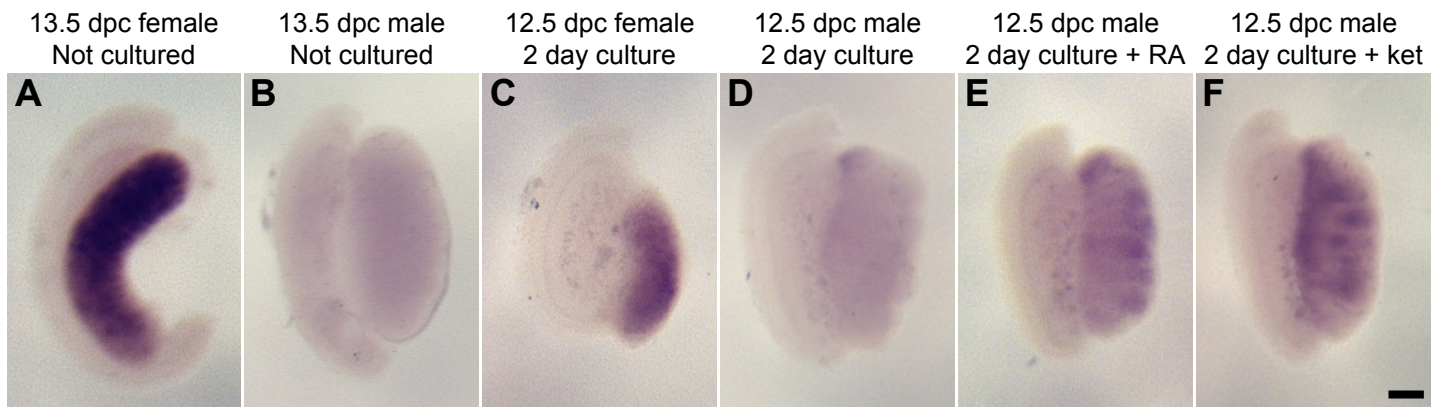

**Supplementary Figure S5. Retinoic acid or ketoconazole can induce *Stra8* expression in cultured male gonads**

A,B. In situ hybridisation showing that *Stra8* is normally expressed in 13.5 dpc female, but not male gonads.

C,D. Sexually dimorphic expression of *Stra8* is maintained in our culture system when 12.5 dpc male or female

gonads are cultured for 2 days on agar blocks. E,F. Treatment of 12.5 dpc male gonads with either 0.7  $\mu$ M retinoic acid (RA) or 0.7  $\mu$ M ketoconazole (ket) for 2 days in culture induces ectopic expression of *Stra8* in our culture system consistent with previous reports (Bowles et al., 2006, Koubova et al., 2006).

In situ hybridisation was performed as described by Henrique et al., 1995

Scale bar 0.1 mm.

| <b>Antibody</b>                   | <b>Source</b>                        | <b>Concentration for immunostaining</b> |
|-----------------------------------|--------------------------------------|-----------------------------------------|
| mouse anti-Amh                    | Abcam                                | 1:40                                    |
| mouse anti-GFP/YFP                | Roche Applied Sciences               | 1 µg/mL                                 |
| mouse anti-Sycp3                  | Abcam                                | 1:1000                                  |
| mouse anti-Tfrc                   | Invitrogen                           | 1 µg/mL                                 |
| mouse anti-Vti1b                  | Becton Dickinson                     | 1:50                                    |
| Oregon Green - phalloidin         | Invitrogen                           | 0.15 µM                                 |
| rabbit anti-HA                    | Sigma-Aldrich                        | 10 µg/mL                                |
| rabbit anti-Mvh                   | Abcam                                | 0.1 µg/mL                               |
| rabbit anti-Sdmg1                 | This study                           | 1 µg/mL                                 |
| rabbit anti-Stx2                  | Calbiochem                           | 1 µg/mL                                 |
| rabbit anti-Stx3                  | Calbiochem                           | 1:100                                   |
| rabbit anti-Stx7                  | Borner et al., 2006                  | 1:400                                   |
| mouse anti-Stx16                  | Borner et al., 2006                  | 1:300                                   |
| rabbit anti-Vamp3                 | Borner et al., 2006                  | 1:100                                   |
| rabbit anti-Vamp4                 | Steggmaier et al., 1999              | 1:500                                   |
| rabbit anti-Vamp7                 | Borner et al., 2006                  | 1:50                                    |
| rabbit anti-Vamp8                 | Borner et al., 2006                  | 1:200                                   |
| rabbit IgG (non-specific control) | Sigma-Aldrich                        | 1 µg/mL                                 |
| rat anti-GCNA                     | Enders and May, 1994                 | 1:10                                    |
| rat anti-Lamp1                    | Developmental Studies Hybridoma Bank | 1 µg/mL                                 |

**Supplementary Table S1. Sources and Concentrations of Primary Antibodies**

## REFERENCES FOR SUPPLEMENTARY MATERIAL

- Adams,I.R. and McLaren,A.** (2004). Identification and characterisation of mRif1: a mouse telomere-associated protein highly expressed in germ cells and embryo-derived pluripotent stem cells. *Dev Dyn* **229**, 733-44.
- Borner,G.H.H., Harbour,M., Hester,S., Lilley,K.S., and Robinson,M.S.** (2006). Comparative proteomics of clathrin-coated vesicles. *J. Cell Biol.* **175**, 571-578.
- Bowles,J., Knight,D., Smith,C., Wilhelm,D., Richman,J., Mamiya,S., Yashiro,K., Chawengsaksophak,K., Wilson,M.J., Rossant,J. et al.** (2006). Retinoid Signaling Determines Germ Cell Fate in Mice. *Science* **312**, 596-600.
- Enders,G.C. and May,J.J.2.** (1994). Developmentally regulated expression of a mouse germ cell nuclear antigen examined from embryonic day 11 to adult in male and female mice. *Dev Biol* **163**, 331-40.
- Henrique,D., Adam,J., Myat,A., Chitnis,A., Lewis,J., and Ish-Horowicz,D.** (1995). Expression of a Delta homologue in prospective neurons in the chick. *Nature* **375**, 787-790.
- Koubova,J., Menke,D.B., Zhou,Q., Capel,B., Griswold,M.D., and Page,D.C.** (2006). Retinoic acid regulates sex-specific timing of meiotic initiation in mice. *Proceedings of the National Academy of Sciences* **103**, 2474-2479.
- Steggmaier,M., Klumperman,J., Foletti,D.L., Yoo,J.S., and Scheller,R.H.** (1999). Vesicle-associated Membrane Protein 4 is Implicated in Trans-Golgi Network Vesicle Trafficking. *Mol. Biol. Cell* **10**, 1957-1972.
- Thompson,J.D., Higgins,D.G., and Gibson,T.J.** (1994). CLUSTAL W: improving the sensitivity of progressive multiple sequence alignment through sequence weighting, position-specific gap penalties and weight matrix choice. *Nucleic Acids Res.* **22**, 4673-4680.
